# Supplementary material for: The Root of Atractylodes macrocephala Koidzumi Prevents Obesity and Glucose Intolerance and Increases Energy Metabolism in Mice
Source: PubMed Central journal article supplement (PMC5796224; doi:10.3390/ijms19010278), 2018-01-17
Supplement: ijms-19-00278-s001.pdf [file ijms-19-00278-s001.pdf]

## Supplementary material

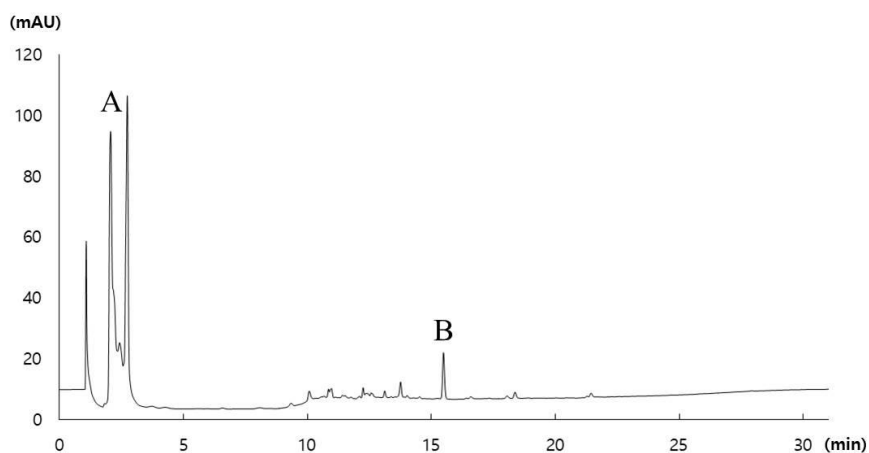

**Figure S1.** HPLC fingerprint of ARA. (A) atractylodin; (B) atractylenolide III. HPLC, High Performance Liquid Chromat; ARA, Atractylodis Rhizoma Alba.

## Supplementary Materials and Methods

### *HPLC analysis*

HPLC was performed using an Agilent 1220 Infinity LC System (Agilent Technologies, Santa Clara, CA, USA) and an Agilent Eclipse XDB-C18 column (4.6 mm x250 mm, 5  $\mu$ m) (Agilent Technologies). HPLC quality water and methanol were used as a mobile phase with gradient elution at a flow rate of 0.5 mL/min. 20  $\mu$ L of ARA extract (50 mg/mL), atractylodin (500  $\mu$ M) (the isolated standard compound [1] was supplied by professor Chin.) and atractylenolide III (100  $\mu$ M) (the standard compound, Sigma-Aldrich, St. Louis, MO, USA) injected and detected at 220 nm using a DAD detector.

1. Chae, H.S.; Kim, Y.M.; Chin, Y.W. Atractylodin inhibits interleukin-6 by blocking NPM-ALK activation and MAPKs in HMC-1. *Molecules* 2016,21,1169, doi: 10.3390/molecules21091169. Available online: <https://www.ncbi.nlm.nih.gov/pubmed/27598116>.
